# Supplementary material for: Design of a robust Ru(salen) complex: aziridination with improved turnover number using N-arylsulfonyl azides as precursorsElectronic supplementary information (ESI) available: typical experimental procedures, determination of enantiomeric excess and elementary analysis for complexes 3 and 5. See http://www.rsc.org/suppdata/cc/b4/b407693a/
Source: Royal Society of Chemistry journal article supplement (doi:10.1039/b407693a), 2004-01-01
Supplement: b407693a.pdf [file b407693a.pdf]

## Electronic Supplementary Information

### General

<sup>1</sup>H and <sup>13</sup>C NMR spectra were recorded at 400 MHz on a JEOL JNM-AL-400 instrument. All signals were expressed as ppm down field from tetramethylsilane used as an internal standard ( $\delta$ -value in CDCl<sub>3</sub>). Optical rotations were measured with a JASCO P-1020 polarimeter. Column chromatography was conducted on silica gel 60N (spherical, neutral), 63-210 mm, available from Kanto Chemical Co., Inc. Solvents were dried and distilled shortly before use. Reactions were carried out under nitrogen or argon, if necessary.

### Synthesis of (CO)Ru-salen complexes **3** and **5**

The requisite salicylaldehyde derivative **12** for the construction of complex **5** was synthesized as described in **Scheme S1**.

#### (*R*)-2'-Iodo-2-methoxymethoxy-1,1'-binaphthyl **7**

Compound **6** (4.0 g, 12.1 mmol) that was prepared according to the reported procedure<sup>1</sup> was dissolved in THF (60 mL) under N<sub>2</sub> at -78 °C. *n*-BuLi (1.58 M, 8.4 mL, 13.2 mmol) was added to the solution and stirred for 1 h. Diethyl chlorophosphate (2.1 mL, 13.2 mmol) was added to the solution at the temperature, then warmed to room temperature, stirred for 1 h and re-cooled to -78 °C. The mixture was added to a solution of lithium/naphthalene (39.6 mmol, 3.3 eq) in THF (60 mL) and stirred for 1.5 h at the temperature. The mixture was treated with iodine (16.7 g, 65.8 mmol, 5.5 eq), stirred for another 2 h, warmed to room temperature, and concentrated in vacuo.<sup>2</sup> The residue was passed through a short silica gel column (hexane-toluene= 1/0-0/1) to obtain a *ca.* 1:1 mixture of **7** and **8**. Crystallization of the mixture from CH<sub>2</sub>Cl<sub>2</sub>/hexane gave pure **7** in 45% yield.

**7**: [ $\alpha$ ]<sub>D</sub><sup>25</sup> +32 (*c* 0.32, CHCl<sub>3</sub>). <sup>1</sup>H NMR (400 MHz, CDCl<sub>3</sub>, 25 °C):  $\delta$  8.05 (d, *J* = 8.8 Hz, 1H), 8.01 (d, *J* = 7.8 Hz, 1H), 7.90 (m, 2H), 7.67 (d, *J* = 8.8 Hz, 1H), 7.60 (d, *J* = 9.0 Hz, 1H), 7.47 (m, 1H), 7.37 (m, 1H), 7.25 (m, 3H), 6.99 (d, *J* = 8.8 Hz, 1H), 5.11 (ABq, *J* = 7.1 Hz, 2H), 3.23 (s, 3H). Anal. Calcd. for C<sub>22</sub>H<sub>17</sub>IO<sub>2</sub>: C, 60.02; H, 3.89. Found: C, 60.23; H, 3.89.

#### (*S*)-2-Methoxymethoxy -1,1'-binaphthyl **8**

<sup>1</sup>H NMR (400 MHz, CDCl<sub>3</sub>, 25 °C):  $\delta$  7.96-7.93 (m, 3H), 7.88 (d, *J* = 8.3 Hz, 1H), 7.61 (dd, *J* = 7.3 and 7.8 Hz, 1H), 7.56 (d, *J* = 9.0 Hz, 1H), 7.48-7.44 (m, 2H), 7.37- 7.34 (m, 2H), 7.29-7.21 (m, 2H), 7.17 (d, *J* = 8.4 Hz 1H), 5.02 (ABq, *J* = 6.8 Hz, 2H), 3.13 (s, 3H).

#### (*R*)-2'-(3,5-Difluorophenyl)-2-methoxymethoxy-1,1'-binaphthyl **9**

Compound **7** (1.0 g, 2.27 mmol), Pd(PPh<sub>3</sub>)<sub>4</sub> (131 mg, 0.11 mmol, 5 mol%), cesium fluoride (1.03 g, 6.81 mmol, 3 eq) and 3,5-difluorophenylboronic acid (860 mg, 5.5 mmol, 2.4 eq) were added to *N,N*-dimethylformamide (DMF) (8 mL). The suspension was heated to 115 °C, stirred for 24 h at

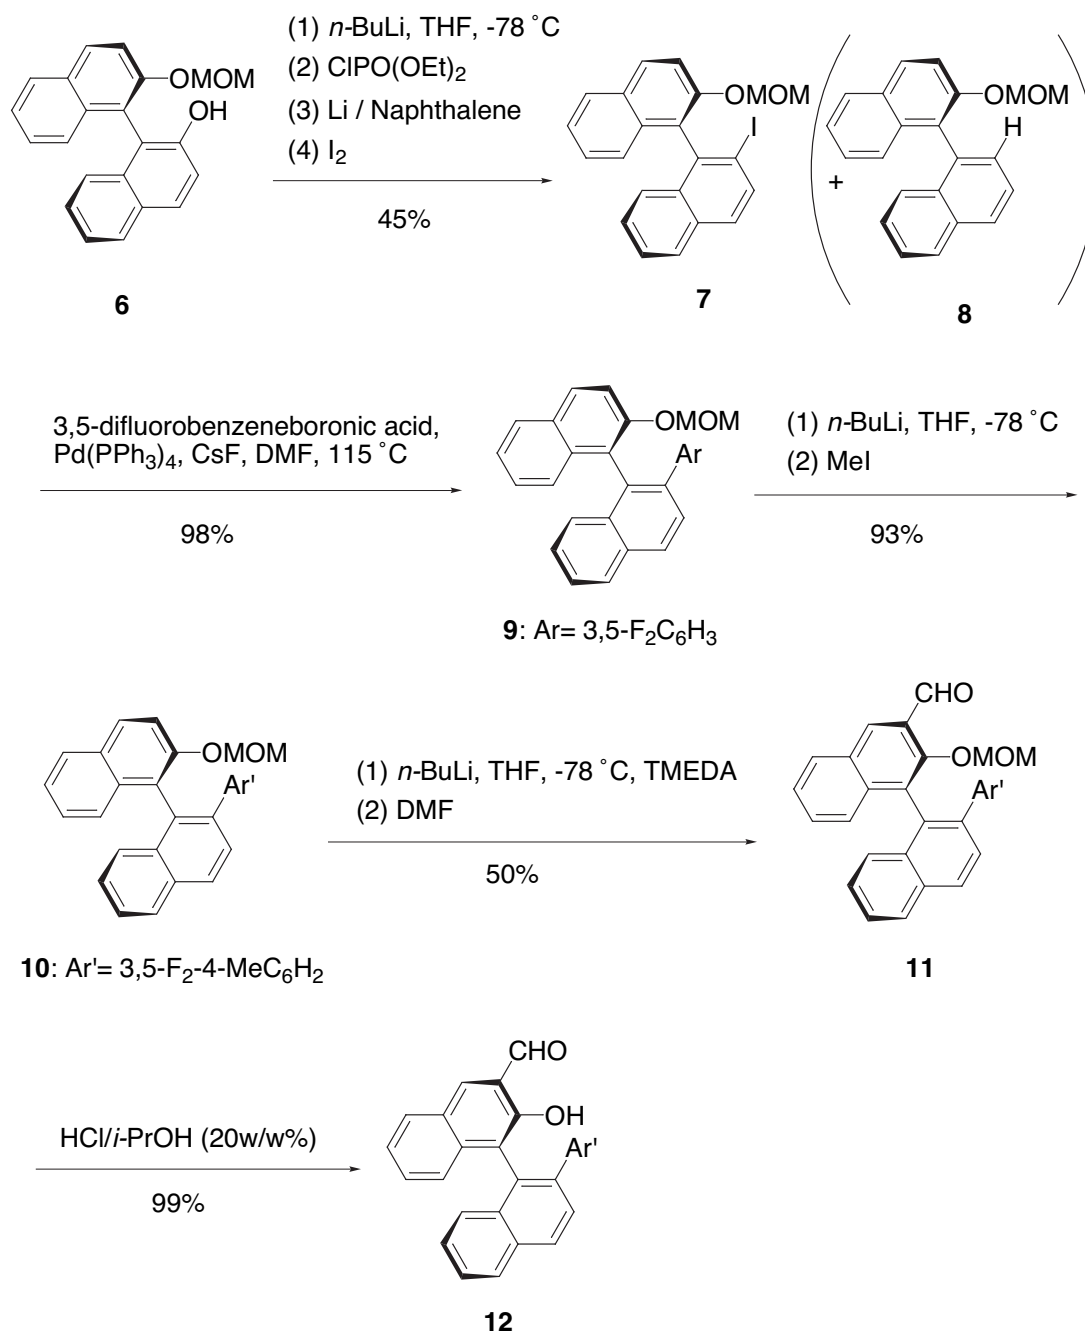

**Scheme S1**

the temperature, and then cooled to room temperature.<sup>3</sup> The mixture was partitioned between diethyl ether and aqueous ammonium chloride, and the organic layer was dried over anhydrous Na<sub>2</sub>SO<sub>4</sub>, and concentrated in vacuo. The residue was chromatographed on silica gel (hexane-ethyl acetate= 19:1) to give **9** in 98% yield.

**9**:  $[\alpha]_{\text{D}}^{25} +39$  (*c* 0.82, CHCl<sub>3</sub>). <sup>1</sup>H NMR (400 MHz, CDCl<sub>3</sub>, 25 °C): δ 8.06 (d, *J* = 8.3 Hz, 1H), 7.95 (d, *J* = 8.6 Hz, 2H), 7.86 (d, *J* = 8.8 Hz, 1H), 7.86 (d, *J* = 8.8 Hz, 1H), 7.64 (m, 1H), 7.47 (m, 2H), 7.26 (m, 3H), 7.02 (d, *J* = 8.1 Hz, 1H), 6.67 (m, 2H), 6.48 (m, 1H), 4.98 (ABq, *J* = 6.8 Hz, 2H), 3.14 (s, 3H). HRFABMS *m/z* Calcd. for C<sub>28</sub>H<sub>20</sub>F<sub>2</sub>O<sub>2</sub> (M<sup>+</sup>): 426.1445; found: 426.1431.

**(aR)- 2'-(3,5-Difluoro-4-methylphenyl)-2-methoxymethoxy-1,1'-binaphthyl 10**

Compound **9** (938 mg, 2.2 mmol) was dissolved in THF (5.6 mL) at  $-78\text{ }^{\circ}\text{C}$  under  $\text{N}_2$ . To the solution was added *n*-BuLi (1.58 M, 1.4 mL, 2.2 mmol, 1.0 eq) and stirred for 1 h. At the temperature, iodomethane (415  $\mu\text{L}$ , 6.7 mmol, 3 eq) was added to the solution, stirred for 1 h, and warmed to room temperature. The mixture was quenched with aqueous ammonium chloride and extracted with diethyl ether. The organic layer was dried over anhydrous  $\text{Na}_2\text{SO}_4$  and concentrated in vacuo. The residue was chromatographed on silica gel (hexane-ethyl acetate= 8:2) to give compound **10** in 93% yield.

**10**:  $[\alpha]_{\text{D}}^{25} +51$  (*c* 0.67,  $\text{CHCl}_3$ ).  $^1\text{H}$  NMR (400 MHz,  $\text{CDCl}_3$ ,  $25\text{ }^{\circ}\text{C}$ ):  $\delta$  8.01 (d,  $J = 8.3$  Hz, 1H), 7.95 (d,  $J = 9.3$  Hz, 1H), 7.94 (d,  $J = 8.1$  Hz, 1H), 7.87 (d,  $J = 9.0$  Hz, 1H), 7.80 (d,  $J = 8.3$  Hz, 1H), 7.58 (d,  $J = 8.8$  Hz, 1H), 7.49 (d,  $J = 8.8$  Hz, 1H), 7.23 (m, 5H), 7.02 (d,  $J = 8.3$  Hz, 1H), 6.67 (d,  $J = 8.1$  Hz, 1H), 4.98 (ABq, 7.0 Hz, 2H), 3.15 (s, 3H), 2.01 (s, 3H). Anal. Calcd. for  $\text{C}_{29}\text{H}_{22}\text{F}_2\text{O}_2$ : C, 79.08; H, 5.03. Found: C, 79.11; H, 5.17.

#### **(aR)- 2'-(3,5-Difluoro-4-methylphenyl)-3-formyl-2-methoxymethoxy-1,1'-binaphthyl 11**

Compound **10** (865 mg, 2.0 mmol) was dissolved in THF (5 mL) at  $-78\text{ }^{\circ}\text{C}$  under  $\text{N}_2$ . To the solution were added *n*-BuLi (1.58 M, 1.4 mL, 2.2 mmol, 1.1 eq) and *N,N,N',N'*-tetramethylethylenediamine (TMEDA) (325  $\mu\text{L}$ , 2.2 mmol, 1.1 eq) and stirred for 1 h. At the temperature, DMF (750  $\mu\text{L}$ , 9.7 mmol, 4.8 eq) was added to the solution, stirred for 1 h, and warmed to room temperature. The mixture was quenched with water and extracted with diethyl ether. The organic layer was dried over anhydrous  $\text{Na}_2\text{SO}_4$  and concentrated in vacuo. The residue was chromatographed on silica gel (hexane-ethyl acetate= 8:2) to give **11** in 50% yield.

**11**:  $[\alpha]_{\text{D}}^{25} -11$  (*c* 0.23,  $\text{CHCl}_3$ ).  $^1\text{H}$  NMR (400 MHz,  $\text{CDCl}_3$ ,  $25\text{ }^{\circ}\text{C}$ ):  $\delta$  10.40 (s, 1H), 8.47 (s, 1H), 8.05 (d,  $J = 8.6$  Hz, 1H), 8.04 (d,  $J = 8.6$  Hz, 1H), 7.97 (m, 1H), 7.60 (d,  $J = 8.6$  Hz, 1H), 7.49 (m, 2H), 7.35 (m, 2H), 7.20 (m, 2H), 6.61 (d,  $J = 8.1$  Hz, 2H), 4.55 (ABq,  $J = 5.7$  Hz, 2H), 2.91 (s, 3H), 2.01 (s, 3H).

#### **(aR)- 2'-(3,5-Difluoro-4-methylphenyl)-3-formyl-2-hydroxy-1,1'-binaphthyl 12**

Compound **11** (468 mg, 1.0 mmol) was dissolved in hydrochloric acid/isopropanol (20 w/w%, 10 mL) and the mixture was stirred overnight at room temperature. The mixture was neutralized with aqueous  $\text{NaHCO}_3$  and extracted with diethyl ether. The organic layer was dried over  $\text{Na}_2\text{SO}_4$  and concentrated in vacuo. The residue was chromatographed on silica gel (hexane-ethyl acetate= 8:2) to give *o*-hydroxy aldehyde **12** in 99 % yield.

**12**:  $[\alpha]_{\text{D}}^{25} -38$  (*c* 0.08,  $\text{CHCl}_3$ ).  $^1\text{H}$  NMR (400 MHz,  $\text{CDCl}_3$ ,  $25\text{ }^{\circ}\text{C}$ ):  $\delta$  10.49 (s, 1H), 10.14 (s, 1H), 8.23 (s, 1H), 8.04 (d,  $J = 8.6$ , 1H), 7.97 (d,  $J = 8.3$  Hz, 1H), 7.90 (m, 1H), 7.58 (d,  $J = 8.6$ , 1H), 7.50 (m, 1H), 7.33 (m, 3H), 7.22 (d,  $J = 8.6$  Hz, 1H), 7.06 (m, 1H), 6.71 (d,  $J = 8.1$  Hz, 2H), 2.00 (s, 3H). Anal. Calcd. for  $\text{C}_{28}\text{H}_{18}\text{F}_2\text{O}_2$ : C, 79.23; H, 4.27. Found: C, 79.10; H, 4.53.

#### **(aR)-2'-[(4-tert-Butyldimethylsilyl)phenyl]-3-formyl-2-hydroxy-1,1'-binaphthyl 13**

The title compound was prepared according to the reported procedure for the synthesis of (aR)-2'-(4-tert-butylphenylsilylphenyl)-3-formyl-2-hydroxy-1,1'-binaphthyl.<sup>4</sup>

**13:**  $^1\text{H}$  NMR (400 MHz,  $\text{CDCl}_3$ , 25 °C):  $\delta$  10.37 (s, 1H), 10.08 (s, 1H), 8.13 (s, 1H), 8.05 (d,  $J = 8.6$ , 1H), 7.97 (d,  $J = 8.3$ , 1H), 7.82 (m, 1H), 7.69 (d,  $J = 8.6$ , 1H), 7.48 (m, 1H), 7.32-7.25 (m, 4H), 7.13-7.09 (m, 5H), 0.65 (s, 9H), 0.13 (s, 6H).

Complexes **3** and **5** were prepared from **12** and **13**, respectively, according to the reported procedure for the synthesis of **1**.<sup>5</sup>

### Complex 3

Anal. Calcd. For  $\text{C}_{73}\text{H}_{72}\text{N}_2\text{O}_3\text{RuSi}_2 \cdot 1.0 \text{H}_2\text{O} \cdot 1.5 \text{CH}_2\text{Cl}_2$ : C, 67.38; H, 5.84; N, 2.11. Found: C, 67.40; H, 5.84; N, 2.20

### Complex 5

Anal. Calcd. For  $\text{C}_{63}\text{H}_{44}\text{F}_4\text{N}_2\text{O}_3\text{Ru} \cdot 1.5\text{H}_2\text{O} \cdot 1.5\text{CH}_2\text{Cl}_2$ : C, 64.10; H, 4.17; N, 2.32. Found: C, 64.09; H, 4.27; N, 2.32.

## Typical Experimental Procedures

### Aziridination of styrene using *p*-toluenesulfonyl azide

Complex **5** (1.0 mg, 0.9  $\mu\text{mol}$ ) was dried twice by azeotropic concentration of its toluene solution (0.25 mL) in vacuo under nitrogen atmosphere. MS 4A (20 mg), styrene (104 mg, 1.0 mmol) and 2-bromonaphthalene (40 mg, as the internal standard) were added to the dried **5**. To the mixture was added dichloromethane (0.5 mL) and the resulting suspension was stirred for 0.5 h at room temperature. *p*-Toluenesulfonyl azide (155  $\mu\text{L}$ , 1.0 mmol) was added to the suspension and stirred for another 12 h. The yield of the corresponding aziridine was determined by  $^1\text{H}$  NMR (400 MHz) analysis.

### Aziridination of styrene using *p*-nitrobenzenesulfonyl azide

Azeotropically dried complex **5** (4.3 mg, 4  $\mu\text{mol}$ ) was placed in a Schlenk tube and purged with nitrogen. Subsequently, MS 4A (20 mg), styrene (10.4 mg, 0.1 mmol), and 2-bromonaphthalene (4.0 mg, as the internal standard) were placed in the tube. To the mixture was added dichloromethane (0.5 mL) and the resulting suspension was stirred for 0.5 h at room temperature. *p*-Nitrobenzenesulfonyl azide (22.8 mg, 0.1 mmol) was added to the suspension and stirred for 24 h. The yield of the corresponding aziridine was determined by  $^1\text{H}$  NMR (400 MHz) analysis.

## Determination of enantiomeric excesses of aziridines

### 2-Phenyl-1-(*p*-toluenesulfonyl)aziridine

The enantiomeric excess was determined by HPLC analysis using DAICEL CHIRALCEL OJ-H (hexane:*i*-PrOH = 1:1, 0.5 mL/min,  $t_R = 23.8$  min and  $t_S = 28.3$  min). Absolute configuration was determined to be *S* by comparison of the specific rotation.<sup>6</sup>

### **1-(*p*-Nitrobenzenesulfonyl)-2-phenylaziridine**

The enantiomeric excess was determined by HPLC analysis using DAICEL CHIRALCEL OD-H (hexane:*i*-PrOH = 8:2, 0.5 mL/min,  $t_{major}$  = 100.5 min and  $t_{minor}$  = 107.7 min).

### **2-(*p*-Bromophenyl)-1-(*p*-toluenesulfonyl)aziridine**

The enantiomeric excess was determined by HPLC analysis using DAICEL CHIRALCEL OD-H (hexane:*i*-PrOH = 8:2, 0.5 mL/min,  $t_{major}$  = 56.5 min and  $t_{minor}$  = 53.0 min).

### **2-(*p*-Bromophenyl)-1-(*p*-nitrobenzenesulfonyl)aziridine**

The enantiomeric excess was determined by HPLC analysis using DAICEL CHIRALCEL OD-H (hexane:*i*-PrOH = 1:1, 0.45 mL/min,  $t_{major}$  = 47.7 min and  $t_{minor}$  = 37.4 min).

### **2-(*p*-Nitrophenyl)-1-(*p*-toluenesulfonyl)aziridine**

The enantiomeric excess was determined by HPLC analysis using DAICEL CHIRALPAK AD-H (hexane:*i*-PrOH = 2:1, 0.5 mL/min,  $t_{major}$  = 34.9 min and  $t_{minor}$  = 31.4 min).

### **2-(2-Naphthyl)-1-(*p*-toluenesulfonyl)aziridine**

The enantiomeric excess was determined by HPLC analysis using DAICEL CHIRALCEL OF (hexane:*i*-PrOH = 2:1, 0.5 mL/min,  $t_{major}$  = 47.1 min and  $t_{minor}$  = 68.0 min).

### **2-Phenylethynyl-1-(*p*-toluenesulfonyl)aziridine**

The enantiomeric excess was determined by HPLC analysis using DAICEL CHIRALPAK AS-H (hexane:*i*-PrOH = 7:3, 0.5 mL/min,  $t_{major}$  = 35.9 min and  $t_{minor}$  = 42.0 min).

### **1-(*p*-Nitrobenzenesulfonyl)-2-phenylethynylaziridine**

The enantiomeric excess was determined by HPLC analysis using DAICEL CHIRALCEL OD-H (hexane:*i*-PrOH = 2:1, 0.5 mL/min,  $t_{major}$  = 35.7 min and  $t_{minor}$  = 43.0 min).

### **2-(*n*-Hexyl)-1-(*p*-toluenesulfonyl)aziridine**

The enantiomeric excess was determined by HPLC analysis using DAICEL CHIRALPAK AS-H (hexane:*i*-PrOH = 9:1, 0.4 mL/min,  $t_{major}$  = 66.2 min and  $t_{minor}$  = 70.5 min).

### ***N-p*-Toluenesulfonylindeno[1,2-*b*]azirine**

The enantiomeric excess was determined by HPLC analysis using DAICEL CHIRALPAK AD (hexane:*i*-PrOH = 15:1, 0.5 mL/min,  $t_{1R,2S}$  = 38.3 min and  $t_{1S,2R}$  = 42.6 min). Absolute configuration was determined to be 1*S*,2*R* by comparison of the specific rotation.<sup>6</sup>

## **References**

1. H. Sasaki, R. Irie, T. Hamada, K. Suzuki, T. Katsuki, *Tetrahedron* **1994**, *50*, 11827-11838.
2. K. Ishihara, K. Inanaga, S. Kondo, M. Funahashi, H. Yamamoto *Synlett* **1998**, 1053-1056.

3. A. Suzuki, N. Miyaura, *Chem. Rev.* **1995**, *95*, 2457-2483.
4. T. Hamada, R. Irie, J. Mihara, K. Hamachi, T. Katsuki, *Tetrahedron* **1998**, *54*, 10017-10028.
5. Murakami, M.; Uchida, T.; Saito, B.; Katsuki, T. *Chirality* **2003**, *15*, 116-123.
6. M. Shi, C.-J. Wang, *Chirality* **2002**, *14*, 412.
